# Supplementary material
Source: MDPI journal article supplement (https://www.mdpi.com/2227-9717/10/4/688)
Supplement: s1 [file s1]

## Support information

# Model-Based Analysis for Ethylene Carbonate Hydrogenation Operation in Industrial-Type Tubular Reactors

Hai Huang <sup>1</sup>, Chenxi Cao <sup>2,\*</sup>, Yue Wang <sup>3</sup>, Youwei Yang <sup>3</sup>, Jianning Lv <sup>4</sup> and Jing Xu <sup>1,5\*</sup>

<sup>1</sup> State Key Laboratory of Chemical Engineering, School of Chemical Engineering, East China University of Science and Technology, Shanghai 200237, China

<sup>2</sup> Key Laboratory of Smart Manufacturing in Energy Chemical Process, Ministry of Education, East China University of Science and Technology, Shanghai 200237, China

<sup>3</sup> Key Laboratory for Green Chemical Technology of Ministry of Education Collaborative Innovation Center of Chemical Science and Engineering, School of Chemical Engineering and Technology, Tianjin University, Tianjin, 300072, China

<sup>4</sup> Wison Engineering Ltd., 633 Zhongke Rd, Zhangjiang, Pudong, Shanghai, 201210, China

<sup>5</sup> Guangxi Key Laboratory of Petrochemical Resource Processing and Process Intensification Technology, School of Chemistry and Chemical Engineering, Guangxi University, Nanning 530004, China

Correspondence: caocx@ecust.edu.cn (Chenxi Cao); xujing@ecust.edu.cn (Jing Xu)

### S1. Reaction kinetics

The reaction system of ethylene carbonate hydrogenation includes three reactions as follows:

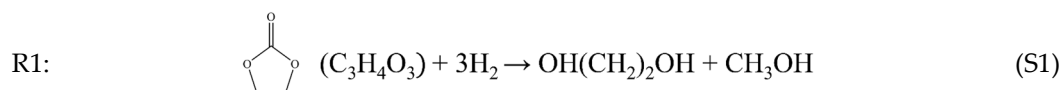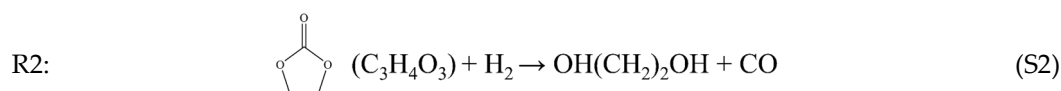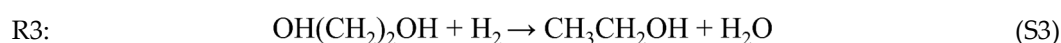

The intrinsic kinetic equations are as follows:

$$r_1 = A_1 \cdot e^{\frac{-Ea_1}{RT}} \cdot C_{EC}^{n_1} \cdot T^{n_1} \quad (S4)$$

$$r_2 = A_2 \cdot e^{\frac{-Ea_2}{RT}} \cdot C_{EC}^{n_2} \cdot T^{n_2} \quad (S5)$$

$$r_3 = A_3 \cdot e^{\frac{-Ea_3}{RT}} \cdot C_{EG}^{n_3} \cdot T^{n_3} \quad (S6)$$

Table S1. Intrinsic kinetic parameters.

|                                   | R1                   | R2                   | R3                   |
|-----------------------------------|----------------------|----------------------|----------------------|
| <i>A</i> ([kmol, s])              | 1.01×10 <sup>1</sup> | 2.11×10 <sup>0</sup> | 2.54×10 <sup>8</sup> |
| <i>Ea</i> (kJ·mol <sup>-1</sup> ) | 30.1                 | 28.1                 | 113.8                |
| <i>n</i>                          | 0.65                 | 1.00                 | 0                    |

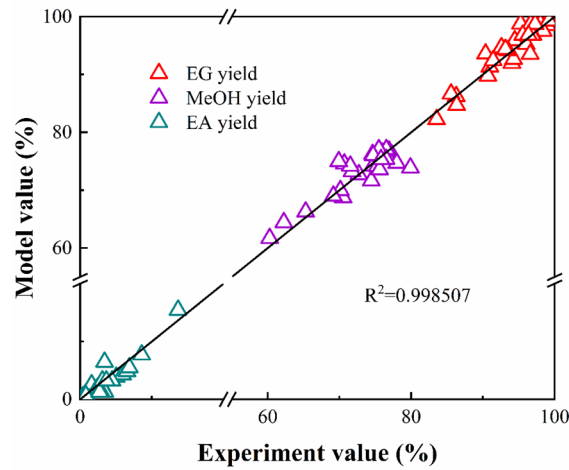

**Figure S1.** Model and experiment values deviation of EC hydrogenation reaction.

In Figure S1, small deviation and high quality coefficient of determination ( $R^2 = 0.998507$ ) mean that fitting of the model is good and reliable.

## S2. Materials properties

### S2.1. Physical properties

The density, heat capacity, thermal conductivity and viscosity of the gas mixture formula are as follows:

$$\rho_f = \frac{P_{op} \cdot M}{R \cdot T} \quad (S7)$$

$$c_{p,m} = \sum_i Y_i c_{p,i} \quad (S8)$$

$$k_f = \sum_i Y_i k_i \quad (S9)$$

$$\mu_m = \sum_i Y_i \mu_i \quad (S10)$$

Where  $Y_i$  is mass fraction of species  $i$ .

According to ASPEN database, the relations between properties parameters of each component ( $c_{p,m}$ ,  $k_i$ ,  $\mu_i$ ) and  $i$ , and the parameter values are shown in Table S2-S4.

**Table S2.** Specific heat capacity.

| $c_{p,i} = A + BT + CT^2 + DT^3$ (323.15 K < $T$ < 523.15 K) |                       |                         |                         |                         |
|--------------------------------------------------------------|-----------------------|-------------------------|-------------------------|-------------------------|
|                                                              | <i>A</i>              | <i>B</i>                | <i>C</i>                | <i>D</i>                |
| EC <sup>1</sup>                                              | 4.032×10 <sup>2</sup> | 2.096×10 <sup>0</sup>   | /                       | /                       |
| EG <sup>2</sup>                                              | 4.810×10 <sup>2</sup> | 2.583×10 <sup>0</sup>   | /                       | /                       |
| MeOH <sup>3</sup>                                            | 6.147×10 <sup>2</sup> | 2.501×10 <sup>0</sup>   | /                       | /                       |
| C <sub>2</sub> H <sub>5</sub> OH                             | 4.722×10 <sup>2</sup> | 3.232×10 <sup>0</sup>   | /                       | /                       |
| H <sub>2</sub> O                                             | 1.986×10 <sup>3</sup> | -1.236×10 <sup>0</sup>  | 3.400×10 <sup>-3</sup>  | -2.096×10 <sup>-6</sup> |
| H <sub>2</sub>                                               | 1.151×10 <sup>4</sup> | 1.695×10 <sup>1</sup>   | -3.170×10 <sup>-2</sup> | 1.983×10 <sup>-5</sup>  |
| CO                                                           | 1.089×10 <sup>3</sup> | -3.614×10 <sup>-1</sup> | 7.247×10 <sup>-4</sup>  | -2.108×10 <sup>-7</sup> |

<sup>1</sup> EC is ethylene carbonate.

<sup>2</sup> EG is ethylene glycol.

<sup>3</sup> MeOH is methanol.

**Table S3.** Thermal conductivity.

|                                  | $k_i = A + BT \text{ (323.15 K} < T < 523.15 \text{ K)}$ |                        |
|----------------------------------|----------------------------------------------------------|------------------------|
|                                  | <b>A</b>                                                 | <b>B</b>               |
| EC                               | $-1.565 \times 10^{-2}$                                  | $8.367 \times 10^{-5}$ |
| EG                               | $-1.499 \times 10^{-2}$                                  | $8.839 \times 10^{-5}$ |
| MeOH                             | $-2.197 \times 10^{-2}$                                  | $1.202 \times 10^{-4}$ |
| C <sub>2</sub> H <sub>5</sub> OH | $-2.200 \times 10^{-2}$                                  | $1.202 \times 10^{-4}$ |
| H <sub>2</sub> O                 | $-1.132 \times 10^{-2}$                                  | $9.569 \times 10^{-5}$ |
| H <sub>2</sub>                   | $5.231 \times 10^{-2}$                                   | $4.278 \times 10^{-4}$ |
| CO                               | $6.200 \times 10^{-3}$                                   | $6.409 \times 10^{-5}$ |

**Table S4.** Viscosity.

|                                  | $\mu_i = A + BT \text{ (323.15 K} < T < 523.15 \text{ K)}$ |                        |
|----------------------------------|------------------------------------------------------------|------------------------|
|                                  | <b>A</b>                                                   | <b>B</b>               |
| EC                               | $-1.565 \times 10^{-2}$                                    | $8.367 \times 10^{-5}$ |
| EG                               | $-1.499 \times 10^{-2}$                                    | $8.839 \times 10^{-5}$ |
| MeOH                             | $-2.197 \times 10^{-2}$                                    | $1.202 \times 10^{-4}$ |
| C <sub>2</sub> H <sub>5</sub> OH | $-2.200 \times 10^{-2}$                                    | $1.202 \times 10^{-4}$ |
| H <sub>2</sub> O                 | $-1.132 \times 10^{-2}$                                    | $9.569 \times 10^{-5}$ |
| H <sub>2</sub>                   | $5.231 \times 10^{-2}$                                     | $4.278 \times 10^{-4}$ |
| CO                               | $6.200 \times 10^{-3}$                                     | $6.409 \times 10^{-5}$ |

**S2.2. EC condensation**

EC partial pressure is compared with saturated vapor pressure to determine EC condensation. The saturated vapor pressure is obtained from the following formula:

$$\ln(P_{EC}^{sat}) = A + \frac{B}{T + C} + DT + E \ln T + FT^G \quad (S11)$$

where  $A = 132.997$ ,  $B = -13115$ ,  $C = 0$ ,  $D = 0$ ,  $E = -17.579$ ,  $F = 7.893 \times 10^{-6}$  and  $G = 2$  from ASPEN database.

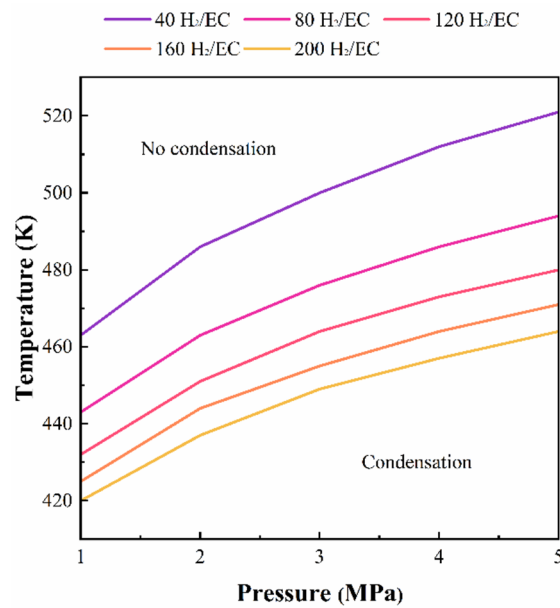**Figure S2.** EC condensation zone under the condition of  $T = 410\text{--}530 \text{ K}$ ,  $P_{op} = 1\text{--}5 \text{ MPa}$  and  $H_2/EC = 40\text{--}200$ .

EC condensation zone becomes larger as H<sub>2</sub>/EC decreases from 200 to 40 in Figure S2.

### S3. Transport properties

#### S3.1. Effective diffusion coefficient

The species mass transfer in the catalysts are related to effective diffusion coefficient  $D_{\text{eff},i}$  that is computed by modified Bosanquet equation [1]:

$$D_{\text{eff},i} = \frac{\varepsilon_{\text{cat}}}{\tau} \left( \frac{1 - \alpha_{M,i} X_i}{D_{M,i}} + \frac{1}{D_{k,i}} \right)^{-1} \quad (\text{S12})$$

where molecular diffusion coefficient  $D_{M,i}$  and Kundsens diffusion coefficient  $D_{k,i}$  are calculated by Wilke equation [2]:

$$\frac{1}{D_{M,i}} = \frac{1}{1 - X_i} \sum_{j \neq i} \frac{X_j}{D_{ij}} \quad (\text{S13})$$

$$D_{k,i} = \frac{d_{\text{pore}}}{3} \sqrt{\frac{8RT}{\pi M_i}} \quad (\text{S14})$$

where binary diffusion coefficient  $D_{ij}$  is computed according to Chapman Enskog Kinetic theory [2]:

$$D_{ij} = 0.001858 \cdot T^{1.5} \frac{\left( \frac{1}{M_i} + \frac{1}{M_j} \right)^{0.5}}{P_{\text{op}} \sigma_{ij}^2 \Omega_D} \quad (\text{S15})$$

The species-average collision diameter  $\sigma_{ij}$  is computed by  $\sigma_{ij} = (\sigma_i + \sigma_j)/2$  and the collision integral  $\Omega_D$  is computed as follows:

$$\Omega_D = \frac{A}{T_N^B} + \frac{C}{\exp(DT_N)} + \frac{E}{\exp(FT_N)} + \frac{G}{\exp(HT_N)} \quad (\text{S16})$$

where  $A = 1.0636$ ,  $B = 0.1561$ ,  $C = 0.193$ ,  $D = 0.47635$ ,  $E = 1.03587$ ,  $F = 1.52996$ ,  $G = 1.76474$ ,  $H = 3.89411$  and  $T_N = k_B T / \varepsilon_{ij}$ .

#### S3.2. Oil heat transfer coefficient

Generally used equation Eq. S17 is to predict shell-side oil heat transfer coefficient, which is based on the weighted average mass velocity  $G_1$  [3].

$$\frac{\alpha_{\text{oil}} D_{\text{out}}}{k_{\text{oil}}} = 0.2 \left( \frac{D_{\text{out}} G_1}{\mu} \right)^{0.6} \left( \frac{c_p \mu}{k_{\text{oil}}} \right)^{0.33} \left( \frac{\mu}{\mu_w} \right)^{0.14} \quad (\text{S17})$$

$$G_1 = \sqrt{G_b G_c} \quad (\text{S18})$$

$$G_b = \frac{\dot{m}_{\text{oil}}}{3600 \cdot S_b} \quad (\text{S19})$$

$$G_c = \frac{\dot{m}_{\text{oil}}}{3600 \cdot S_c} \quad (\text{S20})$$

where  $G_b$  is mass velocity parallel with tubes and  $G_c$  is for cross-flow. And the baffle windows proportional of the shell cross section  $S_b$  and  $S_c$  are calculated by Eqs S25, S26 [3].

$$S_b = f_b \frac{\pi D_s^2}{4} - f_b N_t \frac{\pi D_{\text{out}}^2}{4} \quad (\text{S21})$$

$$S_c = PD_s \left( 1 - \frac{D_{out}}{p} \right) \quad (S22)$$

#### S4. Bed geometry

##### S4.1. Equivalent diameter

For cylindrical catalyst, equal specific surface area diameter ( $d_p^a$ ), equal surface area diameter ( $d_p^s$ ) and equal volume diameter ( $d_p^v$ ) are defined as follows:

$$d_p^a = \left( 0.5d + \frac{l}{d} \right)^{0.5} \quad (S23)$$

$$d_p^s = 3dl(d + 2l) \quad (S24)$$

$$d_p^v = d \left( \frac{3l}{2d} \right)^{\frac{1}{3}} \quad (S25)$$

##### S4.2. Bed voidage

Table S5. Bed voidage.

| $\Phi 2$ m adiabatic reactor |       | $\Phi 0.05$ m single tube $z = \frac{R-r}{d_p^v}$ |                                                                                                                                  |
|------------------------------|-------|---------------------------------------------------|----------------------------------------------------------------------------------------------------------------------------------|
| 3 mm sphere                  | 0.4   | $z \leq 0.637$                                    | $\varepsilon_b(r) = 2.14z - 2.53z + 1$                                                                                           |
| 5 mm sphere                  | 0.4   | $z > 0.637$                                       | $\varepsilon_b(r) = 0.4 + 0.29\exp(-0.6z)$                                                                                       |
| 7 mm sphere                  | 0.4   |                                                   | $\cdot \cos(2.3\pi z - 0.368\pi)$<br>$+ 0.15\exp(-0.9z)$                                                                         |
| 3×3 mm cylinder              | 0.304 | $z < 0.84$ or $z > 1.04$                          | $\varepsilon_b(r) = 1 - 0.696 \cdot$<br>$\left[ 1 - \exp(-1.819z^{0.342}) \cdot \right.$<br>$\left. \cos(6.64z^{1.077}) \right]$ |
| 5×5 mm cylinder              | 0.304 | $0.84 \leq z \leq 1.04$                           | $\varepsilon_b(r) = 1 - 0.696 \cdot$<br>$\left[ 1 - \exp(-1.819z^{0.342}) \cdot \right.$<br>$\left. \cos(6.64z^{1.077}) \right]$ |
| 7×7 mm cylinder              | 0.304 |                                                   | $+ 0.06\cos(5\pi(z - 0.54))$                                                                                                     |

#### S5. Supplementary results

##### S5.1. Contours

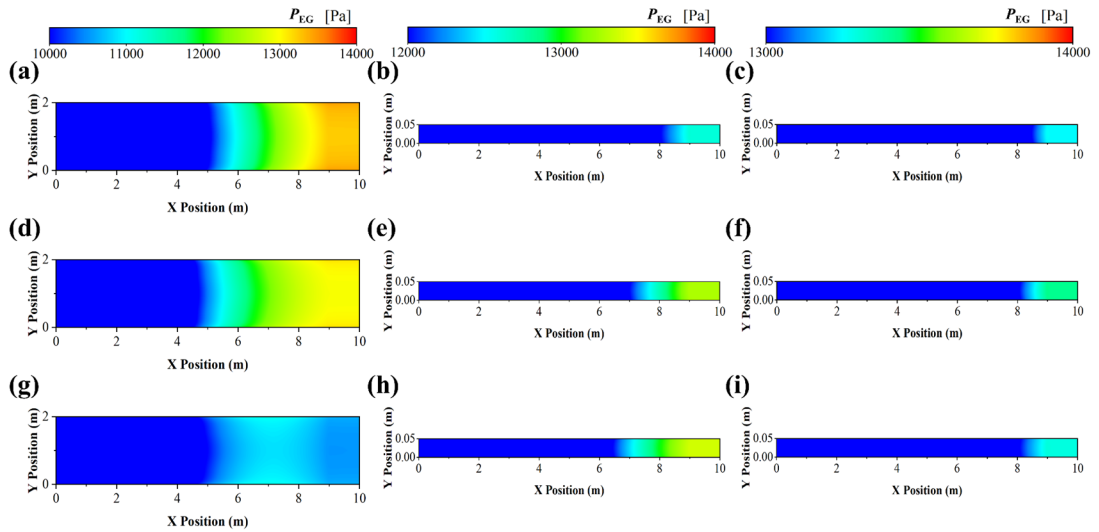

**Figure S3.** Contours of  $P_{EG}$  in different heat-exchange-type reactors: (a) (d) (g) adiabatic, (b) (e) (h) boiling water-cooled, (c) (f) (i) oil-cooled, under the conditions of 3 MPa,  $0.3 \text{ g}_{EC} \cdot \text{g}_{cat}^{-1} \cdot \text{h}^{-1}$ ,  $200 \text{ H}_2/\text{EC}$

and inlet/coolant temperatures of (a) (d) (g) inlet temperatures 443, 463, 483 K, (b)/(c) (e)/(f) (h)/(i) inlet temperature 463 K, coolant temperatures 423, 443, 463 K.

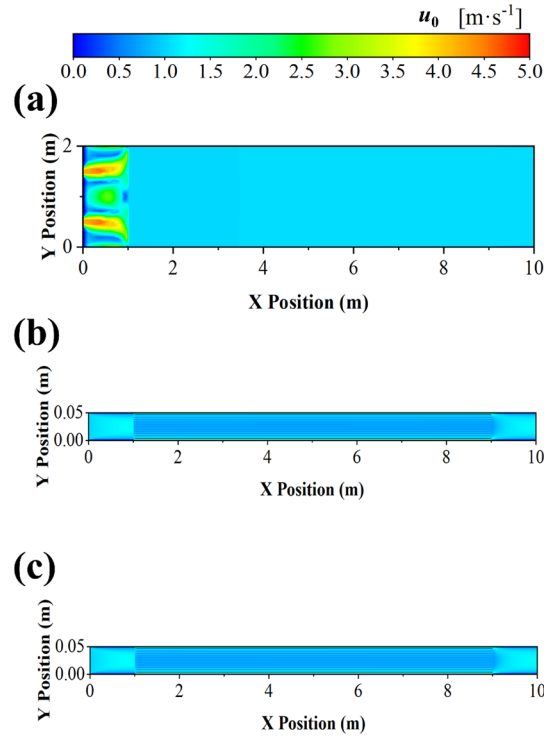

**Figure S4.** Contours of  $u_0$  in different heat exchange type reactor: (a) adiabatic (b) boiling water-cooled (c) oil-cooled under the conditions of 3 MPa,  $0.3 \text{ g}_{\text{EC}}\cdot\text{g}_{\text{cat}}^{-1}\cdot\text{h}^{-1}$ ,  $200 \text{ H}_2/\text{EC}$ , 463 K inlet temperature and 463 K coolant temperature.

### S5.2. Velocity and bed pressure drop

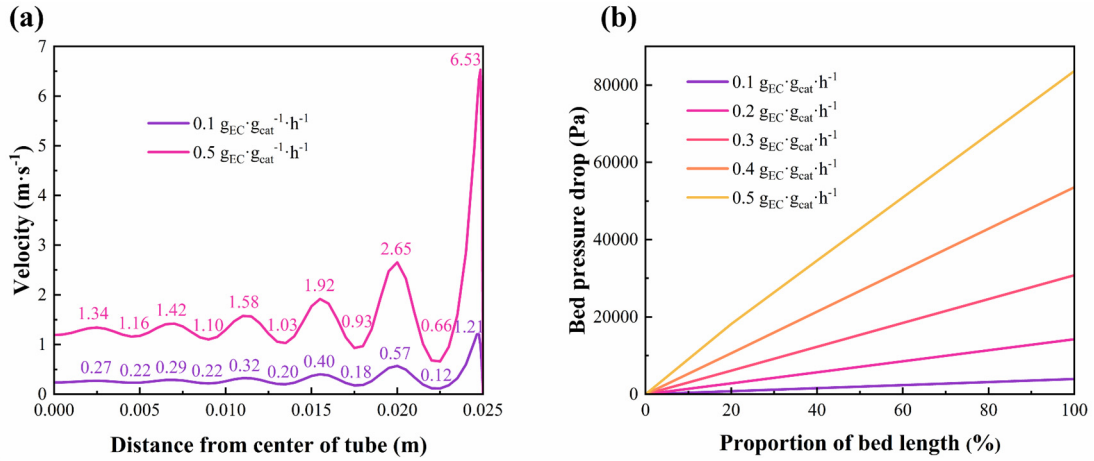

**Figure S5.** The influence of SV on (a) superficial velocity and (b) bed pressure drop, in boiling water-cooled reactor under the conditions of 3 MPa,  $0.3 \text{ g}_{\text{EC}}\cdot\text{g}_{\text{cat}}^{-1}\cdot\text{h}^{-1}$  and  $200 \text{ H}_2/\text{EC}$ .

### S5.3. Inlet/coolant temperature

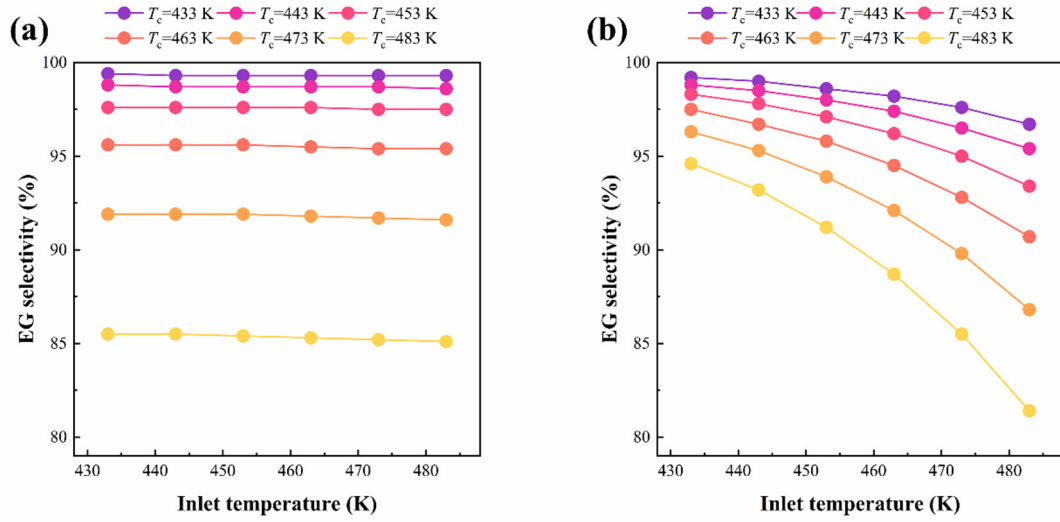

**Figure S6.** The influence of reactant/coolant inlet temperatures on  $S_{EG}$  under the conditions of 3 MPa,  $0.3 \text{ g}_{EC} \cdot \text{g}_{cat}^{-1} \cdot \text{h}^{-1}$  and  $200 \text{ Hz/EC}$ : (a) boiling water-cooled, (b) conduction oil-cooled reactor

In Figure S6,  $S_{EG}$  is determined by coolant inlet temperature not reactant inlet temperature in boiling water-cooled reactor. However, these two temperatures both affect  $S_{EG}$  in oil-cooled reactor.

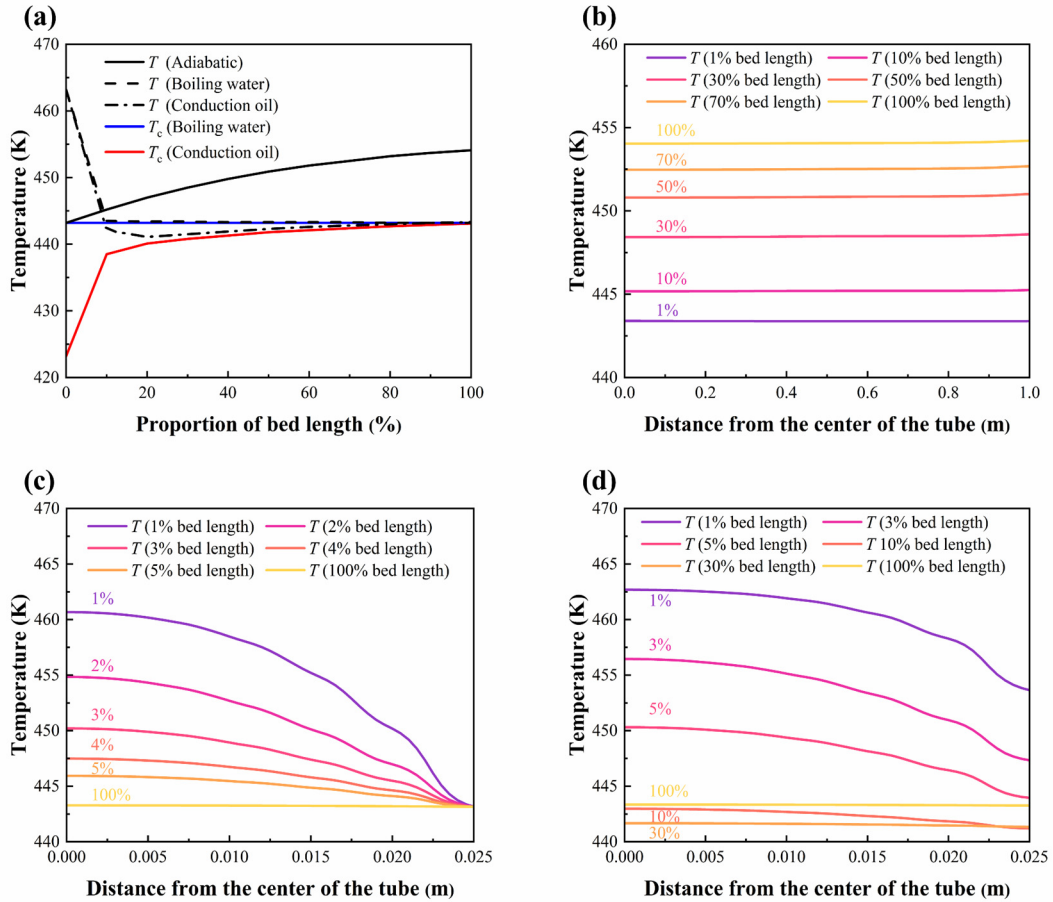

**Figure S7.** Under the conditions of 3 MPa,  $0.3 \text{ g}_{EC} \cdot \text{g}_{cat}^{-1} \cdot \text{h}^{-1}$  and  $200 \text{ Hz/EC}$ , (a) bed and coolant temperatures in the axial direction; bed temperatures in the radial direction: (b) adiabatic,  $T_{in} = 443 \text{ K}$ , (c) boiling water-cooled,  $T_{in} = 463 \text{ K}$  and  $T_c = 443 \text{ K}$  (d) conduction oil-cooled reactors,  $T_{in} = 463 \text{ K}$  and  $T_c = 423 \text{ K}$

It can be seen from Figure S7a that the temperature rise of the adiabatic reactor bed is approximately 12 K. For boiling water-cooled, 463 K reactant temperature is cooled to 443 K as soon as it enters into the bed. The oil inlet temperature of oil-cooled reactor should be 423 K to cool the reactant to 443 K. According to the radial temperature distribution diagram of the bed (Figures S7b-d), the radial temperature of the adiabatic bed is very uniform, and the temperature of the bed with heat exchange is uneven in the front part. The temperature of boiling water-cooled bed is uniform after 5% length, and the radial temperature difference of oil-cooled bed is less than 2 K after 10% length. Different from boiling water-cooled, oil-cooled radial bed temperature first decreases and then increases. When the bed temperature is close to the oil temperature, the reaction heat release leads to temperature rise of oil (Figure S7a).

#### S5.4. Catalyst size and shape

**Table S6.** Influence of catalyst sizes and shapes on reactor performance <sup>1</sup>

|                                   | 3×3 mm<br>cylinder | 5×5 mm<br>cylinder | 7×7 mm<br>cylinder | 3 mm<br>sphere | 5 mm<br>sphere | 7 mm<br>sphere |
|-----------------------------------|--------------------|--------------------|--------------------|----------------|----------------|----------------|
| $X_{EC}$ (%)                      | 99.0               | 89.4               | 76.9               | 99.6           | 93.2           | 82.7           |
| $S_{EG}$ (%)                      | 95.6               | 95.2               | 94.4               | 95.7           | 95.5           | 95.0           |
| $S_{Alcohol}$ (%)                 | 86.3               | 85.9               | 85.1               | 86.1           | 85.7           | 85.0           |
| $\Delta P$ (kPa)                  | 293                | 151                | 93                 | 67             | 31             | 18             |
| Yield of total alcohol<br>(ton/a) | 35209              | 31503              | 26709              | 29746          | 27158          | 23515          |

<sup>1</sup> Reactor type and conditions: Boiling water-cooled reactor,  $P_{op} = 3$  MPa,  $SV = 0.3$  g<sub>EC</sub>·g<sub>cat</sub><sup>-1</sup>·h<sup>-1</sup>,  $T_{in} = 463$  K,  $T_c = 463$  K and  $H_2/EC = 200$ .

Compare the same particle sizes and different shapes:

(1) For sphere catalyst,  $X_{EC}$  is higher and  $\Delta P$  is lower.

(2) For cylinder catalyst,  $\varepsilon_b$  is lower, mass of filled catalysts is higher and yield of product is higher.

(3)  $S_{EG}$  and  $S_{Alcohol}$  are nearly same for sphere and cylinder catalysts.

Compare the same shape and different particle sizes:

(1) For smaller catalyst,  $X_{EC}$  is higher and yield of product is higher.

(2) For larger catalyst,  $\Delta P$  is lower.

#### S5.5. Key variables effect

**Table S7** Effect of key operating variables on  $X_{EC}$ ,  $S_{EG}$ ,  $S_{MeOH}$

|                    | $T$                     | $H_2/EC$              | $P_{op}$             | $SV$                                                                                     |
|--------------------|-------------------------|-----------------------|----------------------|------------------------------------------------------------------------------------------|
| Rise $X_{EC}$      | High                    | High                  | High<br>(Sensitive)  | Low<br>(Sensitive)                                                                       |
| Rise $S_{EG}$      | Low<br>(Very Sensitive) | High for<br>Adiabatic | /                    | High<br>when $SV < 0.2$ g <sub>EC</sub> ·g <sub>cat</sub> <sup>-1</sup> ·h <sup>-1</sup> |
| Rise $S_{MeOH}$    | High<br>(Insensitive)   | High<br>(Insensitive) | Low<br>(Insensitive) | Low<br>(Insensitive)                                                                     |
| No EC<br>Condenses | High                    | High                  | Low                  | /                                                                                        |



## References

1. Plessis, J.P.; Diedericks, G. Fluid transport in porous media: Pore-scale modelling of interstitial transport phenomena. *Computational Mechanics Publications* **1997**, 61-104.
2. Bird, R.B.; Stewart, W.E.; Lightfoot, E.N. *Transport Phenomena*; John Wiley & Sons, Ltd: New York, United States, 1960.
3. McCabe, W.L.; Smith, J.C.; Harriott, P. Heat Transfer to Fluids without Phase Change. In *Unit Operations in Chemical Engineering* Clark, B.J., E., C., Eds.; McGraw Hill, Inc.: New York, United States, 1993; pp. 330-373.
